# Supplementary material for: Mechanical Periodontal Therapy Recovered the Phagocytic Function of Monocytes in Periodontitis
Source: Hindawi journal article supplement (doi:10.1155/2020/8636795), 2020-02-15
Supplement: f1 [file 8636795.f1.pdf]

## Supplementary Material

Table S1: Detailed results from phagocytosis and nitro blue tetrazolium's tests.

|                    |    | p value            |                    |                      |                     |                    |                    |
|--------------------|----|--------------------|--------------------|----------------------|---------------------|--------------------|--------------------|
|                    |    | C                  | PB                 | PA                   | PB X PA             | C X PB             | C X PA             |
| PhI                | ns | 27.4 (15.5 - 40.5) | 13.2 (7.1 - 20.8)  | 33.7 (14.6 - 53.2)   | 0.005 <sup>1</sup>  | 0.02 <sup>2</sup>  | 0.5 <sup>2</sup>   |
|                    | s  | 98 (68.2 - 122.9)  | 60.7 (40.6 - 88.6) | 108.5 (99.6 - 159.5) | 0.001 <sup>1</sup>  | 0.006 <sup>2</sup> | 0.06 <sup>2</sup>  |
| N° ingested yeasts | ns | 1.4 (1.2 - 1.6)    | 1.5 (1.2 - 1.7)    | 1.6 (1.3 - 1.7)      | 0.3 <sup>3</sup>    | 0.2 <sup>4</sup>   | 0.01 <sup>4</sup>  |
|                    | s  | 1.8 (1.5 - 1.9)    | 1.6 (1.5 - 1.8)    | 1.8 (1.4 - 2.1)      | 0.1 <sup>1</sup>    | 0.1 <sup>4</sup>   | 0.6 <sup>2</sup>   |
| % Cells in Ph      | ns | 17.5 (11 - 27.5)   | 8.5 (6 - 12.4)     | 20.5 (10 - 31.2)     | 0.003 <sup>1</sup>  | 0.01 <sup>2</sup>  | 0.9 <sup>2</sup>   |
|                    | s  | 51.7 (43.2 - 66.3) | 37.2 (27.8 - 49.3) | 63.5 (54.3 - 84.5)   | 0.0002 <sup>3</sup> | 0.003 <sup>4</sup> | 0.03 <sup>4</sup>  |
| NBT                | ns | 76.5 (65.7 - 85)   | 75.5 (54.7 - 85.7) | 83.5 (79.2 - 91)     | 0.005 <sup>1</sup>  | 0.4 <sup>2</sup>   | 0.01 <sup>2</sup>  |
|                    | s  | 69.5 (60 - 81.7)   | 73 (60 - 84.5)     | 79 (75 - 89.5)       | 0.01 <sup>3</sup>   | 0.6 <sup>4</sup>   | 0.003 <sup>4</sup> |

C = Control group, PB = Periodontitis group before therapy, PA = Periodontitis group after therapy, PhI = Phagocytic Index, % Cells in Ph = Proportion of cells involved in phagocytosis, NBT = Nitroblue tetrazolium test, ns = nonsensitized *S. Cerevisiae*, s = sensitized *S. Cerevisiae*, stim = stimulated; <sup>1</sup>Wilcoxon test, <sup>2</sup>Mann Whitney test, <sup>3</sup>Paired t test, <sup>4</sup>t test. Results were expressed as median (lower - upper quartiles).
